# Supplementary material for: Analysis of Size Distribution, Chemical Composition, and Optical Properties of Mineral Dust Particles from Dry Deposition Measurement in Tenerife: Determined by Single-Particle Characterization
Source: MDPI journal article supplement (doi:10.3390/atmos14040700), 2023-04-10
Supplement: s1 [file s1]

**“Analysis of size distribution, chemical composition, and optical properties of mineral dust particles from dry deposition measurement in Tenerife: determined by single-particle characterization”**

**Andebo Waza <sup>1,2,\*</sup>, Kilian Schneiders <sup>1,3</sup>, Johannes Heuser <sup>1,4</sup> and Konrad Kandler <sup>1,4,\*</sup>**

<sup>1</sup> Institute for Applied Geosciences, Technische Universität Darmstadt, D-64287 Darmstadt, Germany; kilian.schneiders@mailbox.org (K.S.); johannes.heuser@lisa.ipsl.fr (J.H.)

<sup>2</sup> Department of Life, Earth and Environmental Sciences, West Texas A&M University, Canyon, TX 79016-0001, USA

<sup>3</sup> German Meteorological Service, D-63067 Offenbach, Germany

<sup>4</sup> Laboratoire Inter-Universitaire des Systems Atmospheric (LISA), Université Paris-Est Créteil and Université Paris Cité; Centre national de la recherche scientifique (CNRS), 94010 Créteil, France

\* Correspondence: andebo.waza@geo.tu-darmstadt.de (A.W.); kandler@geo.tu-darmstadt.de (K.K.)

# 1 Chemical composition

## 1.1 Definition of particle class

Table S1: Defintion of particle class

|    | Group name                                        | Classification criteria                                                                                                                                                                                                                                                                                                                                                                                                                     | Class             |
|----|---------------------------------------------------|---------------------------------------------------------------------------------------------------------------------------------------------------------------------------------------------------------------------------------------------------------------------------------------------------------------------------------------------------------------------------------------------------------------------------------------------|-------------------|
| 1  | Fe-rich [Fe-rich]                                 | $\text{Fe}/(\text{F}+\text{Na}+\text{Mg}+\text{Al}+\text{Si}+\text{P}+\text{S}+\text{Cl}+\text{K}+\text{Ca}+\text{Ti}+\text{Cr}+\text{Mn}+\text{Fe})=0.5\ldots 1.01, \text{Cr}/(\text{Cr}+\text{Fe})=0\ldots 0.1$ And $\text{Cl}/(\text{Cl}+\text{Fe})=0\ldots 0.1$                                                                                                                                                                         | Oxides/Hydroxides |
| 2  | Mg-rich [Mg-rich]                                 | $\text{Mg}/(\text{F}+\text{Na}+\text{Mg}+\text{Al}+\text{Si}+\text{P}+\text{S}+\text{Cl}+\text{K}+\text{Ca}+\text{Ti}+\text{Cr}+\text{Mn}+\text{Fe})=0.7\ldots 1.01$                                                                                                                                                                                                                                                                        | Others            |
| 3  | Ti-rich [Ti-rich]                                 | $\text{Ti}/(\text{F}+\text{Na}+\text{Mg}+\text{Al}+\text{Si}+\text{P}+\text{S}+\text{Cl}+\text{K}+\text{Ca}+\text{Ti}+\text{Cr}+\text{Mn}+\text{Fe})=0.7\ldots 1.01, \text{Ca}/(\text{Ca}+\text{Ti})=0\ldots 0.3$                                                                                                                                                                                                                           | Oxides/Hydroxides |
| 4  | Ti-rich [Ti-Ca-rich]                              | $(\text{Ti}+\text{Ca})/(\text{F}+\text{Na}+\text{Mg}+\text{Al}+\text{Si}+\text{P}+\text{S}+\text{Cl}+\text{K}+\text{Ca}+\text{Ti}+\text{Cr}+\text{Mn}+\text{Fe})=0.7\ldots 1.01, \text{Ca}/(\text{Ca}+\text{Ti})=0.3\ldots 0.7$                                                                                                                                                                                                             | Oxides/Hydroxides |
| 5  | FeTi-rich [Ilmenit]                               | $(\text{Fe}+\text{Ti})/(\text{F}+\text{Na}+\text{Mg}+\text{Al}+\text{Si}+\text{P}+\text{S}+\text{Cl}+\text{K}+\text{Ca}+\text{Ti}+\text{Cr}+\text{Mn}+\text{Fe})=0.7\ldots 1.01, \text{Ti}/\text{Fe}=0.25\ldots 4$                                                                                                                                                                                                                          | Oxides/Hydroxides |
| 6  | Quartz [Quartz]                                   | $\text{Si}/(\text{F}+\text{Na}+\text{Mg}+\text{Al}+\text{Si}+\text{P}+\text{S}+\text{Cl}+\text{K}+\text{Ca}+\text{Ti}+\text{Cr}+\text{Mn}+\text{Fe})=0.7\ldots 1.01, (\text{Na}+\text{Mg}+\text{K}+\text{Ca}+\text{Al})/\text{Si}=0\ldots 0.2$                                                                                                                                                                                              | Silicates         |
| 7  | K-rich silicate [K-Feldspar]                      | $(\text{K}+\text{Al}+\text{Si})/(\text{F}+\text{Na}+\text{Mg}+\text{Al}+\text{Si}+\text{P}+\text{S}+\text{Cl}+\text{K}+\text{Ca}+\text{Ti}+\text{Cr}+\text{Mn}+\text{Fe})=0.7\ldots 1.01, \text{Al}/\text{Si}=0.1\ldots 0.5, \text{K}/\text{Si}=0.1\ldots 0.5, \text{Ca}/\text{Si}=0\ldots 0.1, \text{Na}/\text{Si}=0\ldots 0.1$                                                                                                            | Silicates         |
| 8  | Na-rich silicate [Na-Feldspar]                    | $(\text{Na}+\text{Al}+\text{Si})/(\text{F}+\text{Na}+\text{Mg}+\text{Al}+\text{Si}+\text{P}+\text{S}+\text{Cl}+\text{K}+\text{Ca}+\text{Ti}+\text{Cr}+\text{Mn}+\text{Fe})=0.7\ldots 1.01, \text{Al}/\text{Si}=0.1\ldots 0.5, \text{Na}/\text{Si}=0.1\ldots 0.5, \text{Ca}/\text{Si}=0\ldots 0.1, \text{K}/\text{Si}=0\ldots 0.1, (\text{Cl}+2*\text{S})/\text{Na}=0\ldots 0.3, (\text{Cl}+2*\text{S})/(\text{Al}+\text{Si})=0\ldots 0.125$ | Silicates         |
| 9  | Al-rich silicate [Kaolinite]                      | $(\text{Al}+\text{Si})/(\text{F}+\text{Na}+\text{Mg}+\text{Al}+\text{Si}+\text{P}+\text{S}+\text{Cl}+\text{K}+\text{Ca}+\text{Ti}+\text{Cr}+\text{Mn}+\text{Fe})=0.7\ldots 1.01, \text{Al}/\text{Si}=0.5\ldots 1.5, \text{Fe}/(\text{Al}+\text{Si})=0\ldots 0.2, \text{Mg}/(\text{Al}+\text{Si})=0\ldots 0.2, \text{Ca}/(\text{Al}+\text{Si})=0\ldots 0.2, (\text{Na}+\text{Cl}+2*\text{S})/(\text{Al}+\text{Si})=0\ldots 0.25$             | Silicates         |
| 10 | MgAl-rich silicate [Mg-Clay]                      | $(\text{Mg}+\text{Al}+\text{Si})/(\text{F}+\text{Na}+\text{Mg}+\text{Al}+\text{Si}+\text{P}+\text{S}+\text{Cl}+\text{K}+\text{Ca}+\text{Ti}+\text{Cr}+\text{Mn}+\text{Fe})=0.7\ldots 1.01, \text{Al}/\text{Si}=0.5\ldots 1.5, \text{Fe}/(\text{Al}+\text{Si})=0\ldots 0.2, \text{Mg}/(\text{Al}+\text{Si})=0.2\ldots 1.01, (\text{Na}+\text{Cl}+2*\text{S})/(\text{Al}+\text{Si})=0\ldots 0.25$                                             | Silicates         |
| 11 | Fe(Mg)Al-rich silicate [Fe-Clay]                  | $(\text{Mg}+\text{Fe}+\text{Al}+\text{Si})/(\text{F}+\text{Na}+\text{Mg}+\text{Al}+\text{Si}+\text{P}+\text{S}+\text{Cl}+\text{K}+\text{Ca}+\text{Ti}+\text{Cr}+\text{Mn}+\text{Fe})=0.7\ldots 1.01, \text{Al}/\text{Si}=0.5\ldots 1.5, \text{Fe}/(\text{Al}+\text{Si})=0.2\ldots 1.01, (\text{Na}+\text{Cl}+2*\text{S})/(\text{Al}+\text{Si})=0\ldots 0.25$                                                                                | Silicates         |
| 12 | Ca-rich silicate/Ca-Si-mixture [Ca-rich silicate] | $(\text{Ca}+\text{Al}+\text{Si})/(\text{F}+\text{Na}+\text{Mg}+\text{Al}+\text{Si}+\text{P}+\text{S}+\text{Cl}+\text{K}+\text{Ca}+\text{Ti}+\text{Cr}+\text{Mn}+\text{Fe})=0.7\ldots 1.01, \text{Ca}/(\text{Al}+\text{Si})=0.3\ldots 3, (\text{Na}+\text{Cl}+2*\text{S})/(\text{Al}+\text{Si})=0\ldots 0.25$                                                                                                                                | Silicates         |

|    |                                                    |                                                                                                                                                                                                                                                                                                                                                             |                  |
|----|----------------------------------------------------|-------------------------------------------------------------------------------------------------------------------------------------------------------------------------------------------------------------------------------------------------------------------------------------------------------------------------------------------------------------|------------------|
| 13 | Complex silicate (low Al)<br>[complex feldspar]    | $(Al+Si+Na+Mg+K+Ca+Fe) / (F+Na+Mg+Al+Si+P+S+Cl+K+Ca+Ti+Cr+Mn+Fe)=0.7 \dots 1.01$ , $Al/Si=0.05 \dots 0.5$ , $(Na+K+Ca)/Si=0.1 \dots 1$ , $Fe/Si=0 \dots 0.5$ , $Ca/Si=0 \dots 0.5$ , $K/Si=0 \dots 0.5$ , $Mg/Si=0 \dots 0.5$ , $K/Si=0 \dots 0.5$ , $(Na+Cl+2*S)/(Al+Si)=0 \dots 0.25$                                                                     | Silicates        |
| 14 | complex silicate (high Al)<br>[complex clay]       | $(Al+Si+Na+Mg+K+Ca+Fe) / (F+Na+Mg+Al+Si+P+S+Cl+K+Ca+Ti+Cr+Mn+Fe)=0.7 \dots 1.01$ , $Al/Si=0.5 \dots 1.5$ , $(Mg+Fe+K)/Si=0.1 \dots 1$ , $Fe/Si=0 \dots 0.5$ , $Ca/Si=0 \dots 0.5$ , $K/Si=0 \dots 0.5$ , $Mg/Si=0 \dots 0.5$ , $K/Si=0 \dots 0.5$ , $(Na+Cl+2*S)/(Al+Si)=0 \dots 0.25$                                                                      | Silicates        |
| 15 | Ca-rich<br>[Calcite]                               | $Ca/(F+Na+Mg+Al+Si+P+S+Cl+K+Ca+Ti+Cr+Mn+Fe)=0.7 \dots 1.01$ , $(Al+Si)/Ca=0 \dots 0.3$ , $Mg/Ca=0 \dots 0.3$ , $S/Ca=0 \dots 0.3$ , $Cl/Ca=0 \dots 0.3$                                                                                                                                                                                                     | Ca-rich          |
| 16 | CaMg-rich<br>[Dolomite]                            | $(Mg+Ca) / (F+Na+Mg+Al+Si+P+S+Cl+K+Ca+Ti+Cr+Mn+Fe)=0.7 \dots 1.01$ , $Mg/Ca=0.3 \dots 3$ , $S/Ca=0 \dots 0.3$ , $Cl/Ca=0 \dots 0.3$ , $(Al+Si)/Ca=0 \dots 0.3$                                                                                                                                                                                              | Ca-rich          |
| 17 | CaP-rich<br>[Apatite]                              | $(Ca+P) / (F+Na+Mg+Al+Si+P+S+Cl+K+Ca+Ti+Cr+Mn+Fe)=0.7 \dots 1.01$ , $Mg/Ca=0 \dots 0.3$ , $P/(Ca+P)=0.2 \dots 0.8$ , $Cl/Ca=0 \dots 0.3$ , $(Al+Si)/(P+Ca)=0 \dots 0.25$                                                                                                                                                                                    | Ca-rich          |
| 18 | CaS-rich<br>[Gypsum]                               | $(Ca+S) / (F+Na+Mg+Al+Si+P+S+Cl+K+Ca+Ti+Cr+Mn+Fe)=0.7 \dots 1.01$ , $Ca/(Ca+S)=0.2 \dots 0.8$ , $Mg/Ca=0 \dots 0.3$ , $Cl/Ca=0 \dots 0.3$                                                                                                                                                                                                                   | stable sulfates  |
| 19 | AlKS-rich<br>[Alunite]                             | $(Al+K+S) / (F+Na+Mg+Al+Si+P+S+Cl+K+Ca+Ti+Cr+Mn+Fe)=0.7 \dots 1.01$ , $Ca/(Ca+Al+K+S)=0 \dots 0.05$ , $Si/(Si+Al+K+S)=0 \dots 0.1$ , $K/(Al+K+S)=0.05 \dots 0.3$ , $S/(Al+K+S)=0.15 \dots 0.5$ , $Al/(Al+K+S)=0.3 \dots 0.8$                                                                                                                                | stable sulfates  |
| 20 | NaCl-rich<br>[Sea-salt]                            | $(Na+Mg+Cl)/(F+Na+Mg+Al+Si+P+S+Cl+K+Ca+Ti+Cr+Mn+Fe)=0.7 \dots 1.01$ , $Cl/(Na+0.5*Mg)=0.5 \dots 2$ , $Cl / (Cl+S)=0.7 \dots 1.01$ , $S/(Na+0.5*Mg)=0 \dots 0.2$ , $K/Na=0 \dots 0.5$ , $Ca/Na=0 \dots 0.5$ , $Mg/Na=0 \dots 0.5$ , $(Al+Si) / (Na+Cl+S)=0 \dots 0.25$                                                                                       | sea-salt         |
| 21 | NaClS-rich<br>[aged Sea salt]                      | $(Na+Mg+Cl+S+Ca) / (F+Na+Mg+Al+Si+P+S+Cl+K+Ca+Ti+Cr+Mn+Fe)=0.7 \dots 1.01$ , $Cl/(Na+0.5*Mg)=0.2 \dots 0.8$ , $S/(Na+0.5*Mg)=0.2 \dots 0.8$ , $(Cl+2*S) / (Na+0.5*Mg+0.5*Ca)=0.3 \dots 3.333$ , $Cl / (Cl+S)=0.3 \dots 0.7$ , $K / (K+Na)=0 \dots 0.3$ , $Ca / (Ca+Na)=0 \dots 0.2$ , $Mg / (Mg+Na)=0 \dots 0.3$ , $(Al+Si) / (Al+Si+Na+Cl+S)=0 \dots 0.25$ | sea-salt         |
| 22 | NaS-rich<br>[Na Sulfate]                           | $(Na+Mg+S+Cl)/(F+Na+Mg+Al+Si+P+S+Cl+K+Ca+Ti+Cr+Mn+Fe)=0.7 \dots 1.01$ , $S/(Na+0.5*Mg)=0.8 \dots 2$ , $Cl/(Na+0.5*Mg)=0 \dots 0.2$ , $Cl / (Cl+S)=0 \dots 0.3$ , $K/Na=0 \dots 0.5$ , $Ca/Na=0 \dots 0.5$ , $Mg/Na=0 \dots 0.5$ , $(Al+Si)/(Na+Cl+S)=0 \dots 0.25$                                                                                          | soluble sulfates |
| 23 | S-rich<br>[sulfate]                                | $S/(F+Na+Mg+Al+Si+P+S+Cl+K+Ca+Ti+Cr+Mn+Fe)=0.7 \dots 1.01$ , $Cl / (Cl+S)=0 \dots 0.3$ , $Na/S=0 \dots 1.01$ , $Cl/S=0 \dots 0.2$ , $Si/S=0 \dots 0.5$ , $(Al+Si)/S=0 \dots 0.25$                                                                                                                                                                           | Sulfates         |
| 24 | complex sulfate<br>[complex sulfate]               | $(Na+Mg+K+Ca+S+Cl) / (F+Na+Mg+Al+Si+P+S+Cl+K+Ca+Ti+Cr+Mn+Fe)=0.7 \dots 1.01$ , $(Al+Si)/S=0 \dots 0.25$ , $Cl / (Cl+S)=0 \dots 0.3$                                                                                                                                                                                                                         | soluble sulfates |
| 25 | complex soluble salt<br>[complex sulfate-chloride] | $(Na+Mg+K+Ca+S+Cl) / (F+Na+Mg+Al+Si+P+S+Cl+K+Ca+Ti+Cr+Mn+Fe)=0.7 \dots 1.01$ , $(Al+Si)/S=0 \dots 0.25$                                                                                                                                                                                                                                                     | soluble sulfates |

|    |                                    |                                                                                                                                                                                                                                                                                                                                                                             |                            |
|----|------------------------------------|-----------------------------------------------------------------------------------------------------------------------------------------------------------------------------------------------------------------------------------------------------------------------------------------------------------------------------------------------------------------------------|----------------------------|
| 26 | NaCl/Si mixture<br>[NaCl-Si-Mix]   | $(Al+Si+Mg+Fe+Na+Cl+S)/$<br>$(F+Na+Mg+Al+Si+P+S+Cl+K+Ca+Ti+Cr+Mn+Fe)=0.7 \dots 1.01, Fe /$<br>$(F+Na+Mg+Al+Si+P+S+Cl+K+Ca+Ti+Cr+Mn+Fe)=0 \dots 0.3, (Na+Cl+2*S) /$<br>$(Al+Si)=0.25 \dots 4, S/Cl=0 \dots 0.5$                                                                                                                                                              | sea-salt/silicate mixtures |
| 27 | NaS/Si mixture<br>[NaS-Si-Mix]     | $(Al+Si+Mg+Fe+Na+Cl+S)/$<br>$(F+Na+Mg+Al+Si+P+S+Cl+K+Ca+Ti+Cr+Mn+Fe)=0.7 \dots 1.01, Fe /$<br>$(F+Na+Mg+Al+Si+P+S+Cl+K+Ca+Ti+Cr+Mn+Fe)=0 \dots 0.3, (Na+Cl+2*S) /$<br>$(Al+Si)=0.25 \dots 4, S/Cl=0 \dots 0.5, (Na+Cl+2*S) / (Al+Si)=0.25 \dots 4,$<br>$(K+Ca+Fe)/(Si+Al)=0 \dots 0.7, Cl/S=0 \dots 1, S/Na=0 \dots 0.5$                                                    | sulfate/silicate mixtures  |
| 28 | NaClS/Si mixture<br>[NaClS-Si-Mix] | $(Al+Si+Mg+Fe+Na+Cl+S)/$<br>$(F+Na+Mg+Al+Si+P+S+Cl+K+Ca+Ti+Cr+Mn+Fe)=0.7 \dots 1.01, (Na+Cl+2*S) /$<br>$(Al+Si)=0.25 \dots 4, Fe / (F+Na+Mg+Al+Si+P+S+Cl+K+Ca+Ti+Cr+Mn+Fe)=0 \dots$<br>$.3, S/Cl=0.5 \dots 1$                                                                                                                                                               | sea-salt/silicate mixtures |
| 29 | S/Si mixture<br>[S-Si-Mix]         | $(Al+Si+Mg+Fe+Na+S)/$<br>$(F+Na+Mg+Al+Si+P+S+Cl+K+Ca+Ti+Cr+Mn+Fe)=0.7 \dots 1.01, Fe /$<br>$(F+Na+Mg+Al+Si+P+S+Cl+K+Ca+Ti+Cr+Mn+Fe)=0 \dots 0.3, Si /$<br>$(Al+Si+Mg+Fe) = 0.2 \dots 1.01, S/(Al+Si)=0.25 \dots 4, Cl/S=0 \dots 1, Na/S=0 \dots 1$                                                                                                                          | sulfate/silicate mixtures  |
| 30 | other silicate<br>[other silicate] | $(Al+Si+Na+Mg+K+Ca+Fe+Ti)/$<br>$(F+Na+Mg+Al+Si+P+S+Cl+K+Ca+Ti+Cr+Mn+Fe)=0.7 \dots 1.01, (Na+Cl+S) /$<br>$(Al+Si+Fe)=0 \dots 0.25$                                                                                                                                                                                                                                           | silicates                  |
| 31 | complex mixture<br>[complex mix]   | $(Na+Mg+Al+Si+S+Cl+K+Ca+Fe)/$<br>$(F+Na+Mg+Al+Si+P+S+Cl+K+Ca+Ti+Cr+Mn+Fe)=0.7 \dots 1.01, (Na+Cl) /$<br>$(F+Na+Mg+Al+Si+P+S+Cl+K+Ca+Ti+Cr+Mn+Fe)=0.1 \dots 0.9,$<br>$S/(F+Na+Mg+Al+Si+P+S+Cl+K+Ca+Ti+Cr+Mn+Fe)=0.1 \dots$<br>$0.9, (Ca+K+Mg+Fe)/ (F+Na+Mg+Al+Si+P+S+Cl+K+Ca+Ti+Cr+Mn+Fe)=0.1 \dots$<br>$0.9, (Al+Si)/(F+Na+Mg+Al+Si+P+S+Cl+K+Ca+Ti+Cr+Mn+Fe)=0.1 \dots 0.9$ | complex mixtures           |

## 1.2 Inter-particle mixing state of Ca and Fe compounds

Table S2: Total Fe mass deposition rate in  $\text{mg}/(\text{m}^2\text{d})$ .  $\text{Ca}>\text{xx}$ : relative fraction of Fe mass in with an  $\text{R}(\text{Ca})>\text{xx}$ . An  $\text{R}(\text{Ca})$  of 0.05 can be considered as roughly 10 % mass  $\text{CaCO}_3$  in a particle (note that the scale is non-linear for higher  $\text{R}(\text{Ca})$ ).

|            | Total Fe, $\text{mg}/(\text{m}^2\text{d})$ | $\text{R}(\text{Ca})>0.01$ | $\text{R}(\text{Ca})>0.02$ | $\text{R}(\text{Ca})>0.05$ | $\text{R}(\text{Ca})>0.10$ |
|------------|--------------------------------------------|----------------------------|----------------------------|----------------------------|----------------------------|
| 18. Jul 17 | 0.57                                       | 0.581                      | 0.387                      | 0.336                      | 0.099                      |
| 19. Jul 17 | 0.13                                       | 0.347                      | 0.221                      | 0.087                      | 0.056                      |
| 20. Jul 17 | 0.24                                       | 0.775                      | 0.551                      | 0.286                      | 0.075                      |
| 24. Jul 17 | 0.97                                       | 0.349                      | 0.135                      | 0.066                      | 0.040                      |
| 25. Jul 17 | 0.58                                       | 0.262                      | 0.104                      | 0.040                      | 0.012                      |
| 26. Jul 17 | 0.49                                       | 0.297                      | 0.152                      | 0.034                      | 0.008                      |
| 27. Jul 17 | 0.37                                       | 0.229                      | 0.190                      | 0.091                      | 0.067                      |
| 28. Jul 17 | 0.27                                       | 0.268                      | 0.104                      | 0.060                      | 0.031                      |
| 29. Jul 17 | 0.10                                       | 0.762                      | 0.638                      | 0.049                      | 0.000                      |
| 03. Aug 17 | 0.90                                       | 0.714                      | 0.704                      | 0.490                      | 0.040                      |
| 09. Aug 17 | 1.72                                       | 0.581                      | 0.337                      | 0.156                      | 0.094                      |
| 10. Aug 17 | 1.37                                       | 0.640                      | 0.477                      | 0.392                      | 0.224                      |
| 20. Aug 17 | 1.92                                       | 0.445                      | 0.147                      | 0.043                      | 0.026                      |
| 21. Aug 17 | 1.73                                       | 0.290                      | 0.074                      | 0.015                      | 0.010                      |
| 22. Aug 17 | 0.95                                       | 0.252                      | 0.062                      | 0.017                      | 0.009                      |
| mean       | 0.82                                       | 0.453                      | 0.285                      | 0.144                      | 0.053                      |
| median     | 0.70                                       | 0.397                      | 0.206                      | 0.077                      | 0.040                      |

- TFS17\_Fe\_mass\_depo\_rate.csv 'Daily mass deposition rate for iron in  $\text{mg}/(\text{m}^2\text{d})$ .

The columns are a grid representation with the following meaning:

Table S3: grid representation of columns of the **csv** files

|     |                                        |     |                                        |
|-----|----------------------------------------|-----|----------------------------------------|
| Fe0 | $0 < \text{R}(\text{Fe}) \leq 0.02$    | Ca0 | $0 < \text{R}(\text{Ca}) \leq 0.02$    |
| Fe1 | $0.02 < \text{R}(\text{Fe}) \leq 0.05$ | Ca1 | $0.02 < \text{R}(\text{Ca}) \leq 0.05$ |
| Fe2 | $0.05 < \text{R}(\text{Fe}) \leq 0.1$  | Ca2 | $0.05 < \text{R}(\text{Ca}) \leq 0.1$  |
| Fe3 | $0.1 < \text{R}(\text{Fe}) \leq 0.3$   | Ca3 | $0.1 < \text{R}(\text{Ca}) \leq 0.3$   |
| Fe4 | $0.3 < \text{R}(\text{Fe}) \leq 0.6$   | Ca4 | $0.3 < \text{R}(\text{Ca}) \leq 0.6$   |
| Fe5 | $0.6 < \text{R}(\text{Fe}) \leq 1$     | Ca5 | $0.6 < \text{R}(\text{Ca}) \leq 1$     |

The column non-Sil-Cal means  $\text{R}(\text{Ca}) = 0$  and  $\text{R}(\text{Fe}) = 0$ .

- TFS17\_Ca\_mass\_depo\_rate.csv: Daily mass deposition rate for calcium in  $\text{mg}/(\text{m}^2\text{d})$ . Columns as above.
- TFS17\_Total\_mass\_depo\_rate.csv: Daily total mass deposition rate in  $\text{mg}/(\text{m}^2\text{d})$ . Columns as above.
- TFS17\_Total\_number\_depo\_rate.csv: Daily total number deposition rate in  $1/(\text{mm}^2\text{d})$ . Columns as above.

### 1.3 Relative abundance of different particle groups

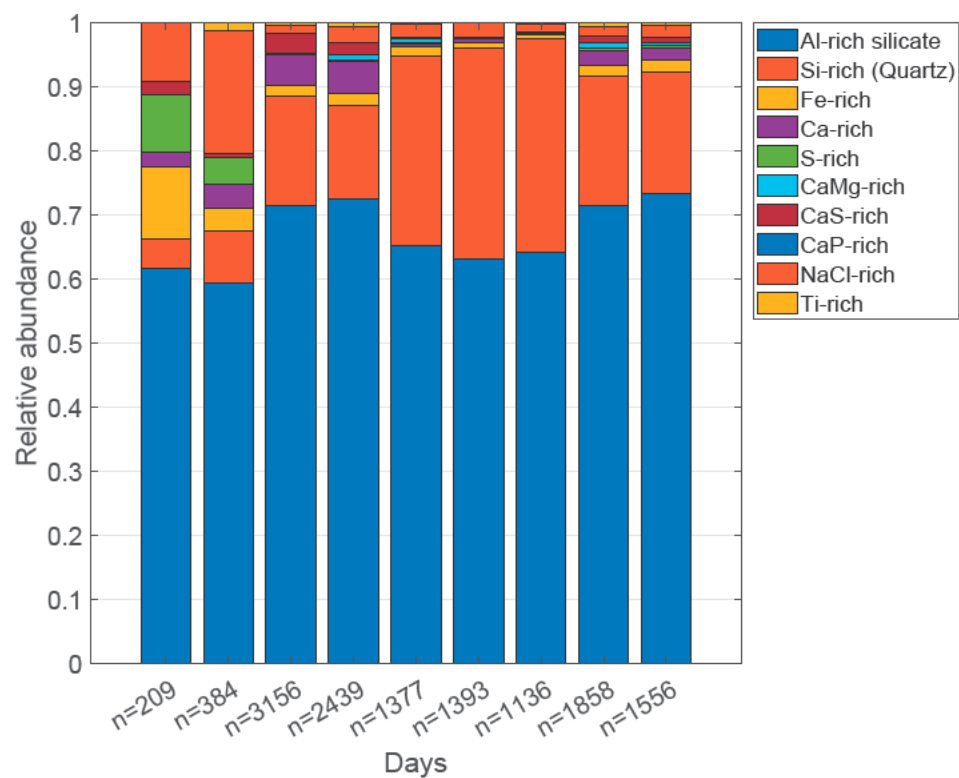

**Figure S1A:** Chemical composition (relative number abundance of different particle groups) of major dust particles per unit of measurement. The total number of particles (n) analyzed on each measurement day is also shown.

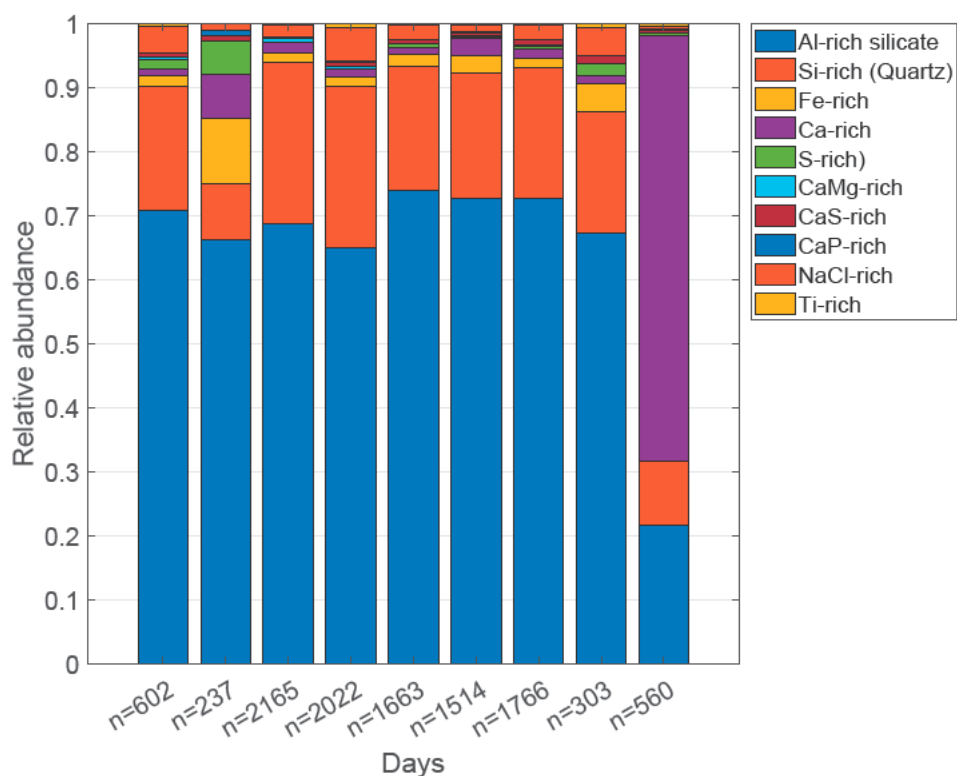

**Figure S1B:** Chemical composition (relative number abundance of different particle groups) of dust samples per unit of measurement. The total number of particles ( $n$ ) analyzed on each measurement day is also shown.

## 2 Mass concentration (Barbados 2013)

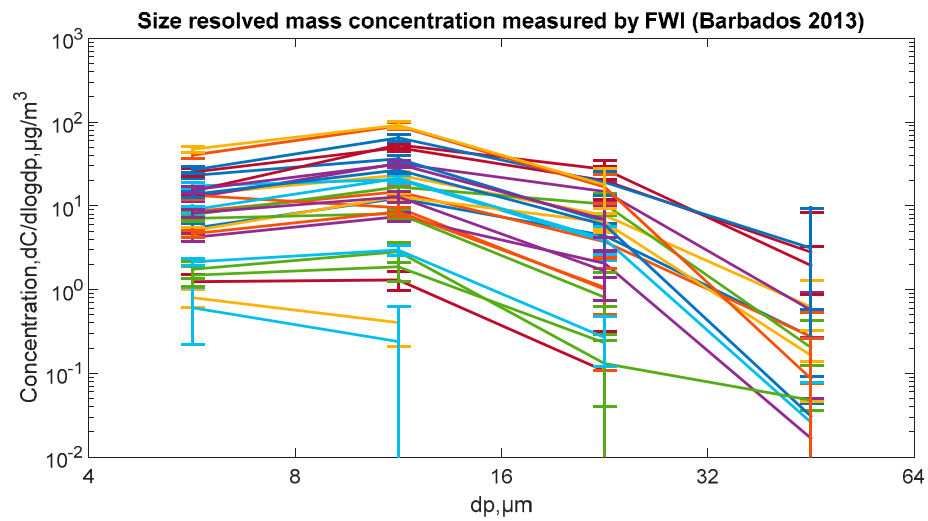

**Figure S 2:** Atmospheric mass size distribution densities derived FWI measurements (Barbados 2013). Error bars represent 95% confidence intervals. Different curves represent different measurement

## 3 Complex index of refraction

### 3.1 Real part

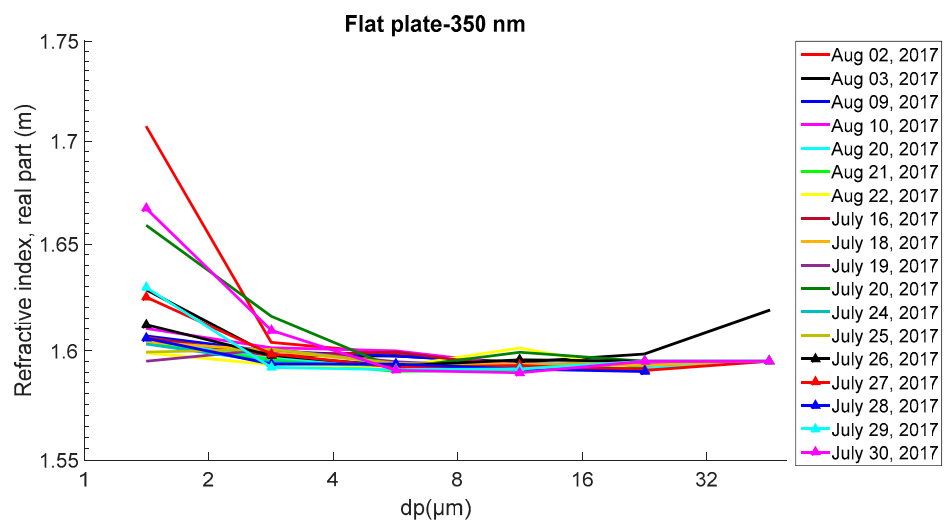

**Figure S 3:** Average complex refractive index (real part) for different sampling days deduced from individual particle analysis (at wave length=350 nm).



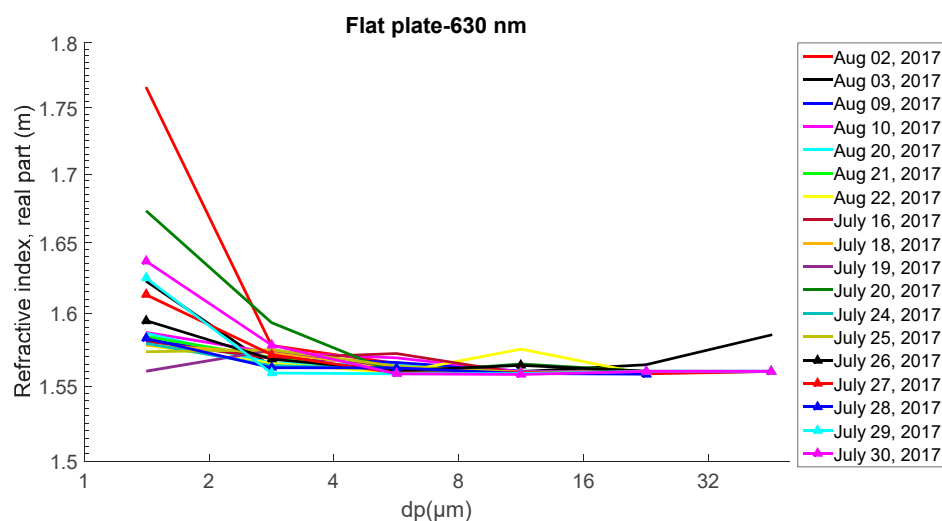

**Figure S 4:** Average complex refractive index (real part) for different sampling days deduced from individual particle analysis (at wave length=630 nm).

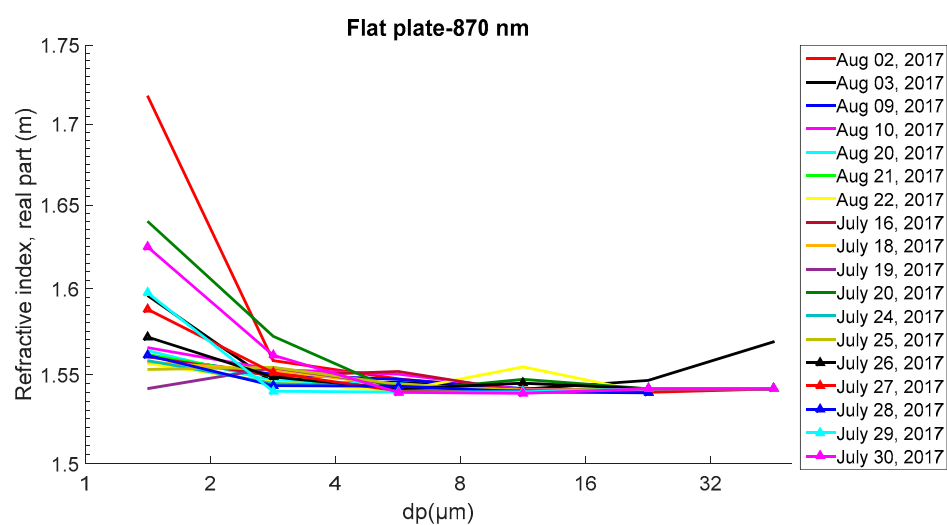

**Figure S 5:** Average complex refractive index (real part) for different sampling days deduced from individual particles analysis (at wave length=870 nm).

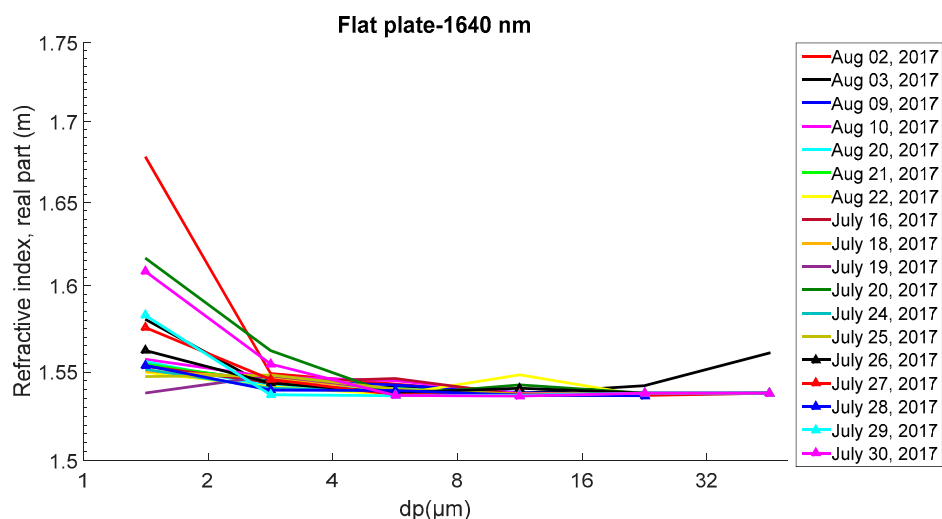

**Figure S 6:** Average complex refractive index (real part) for different sampling days deduced from individual particle analysis (at wave length=1640 nm).

### 3.2 Imaginary part

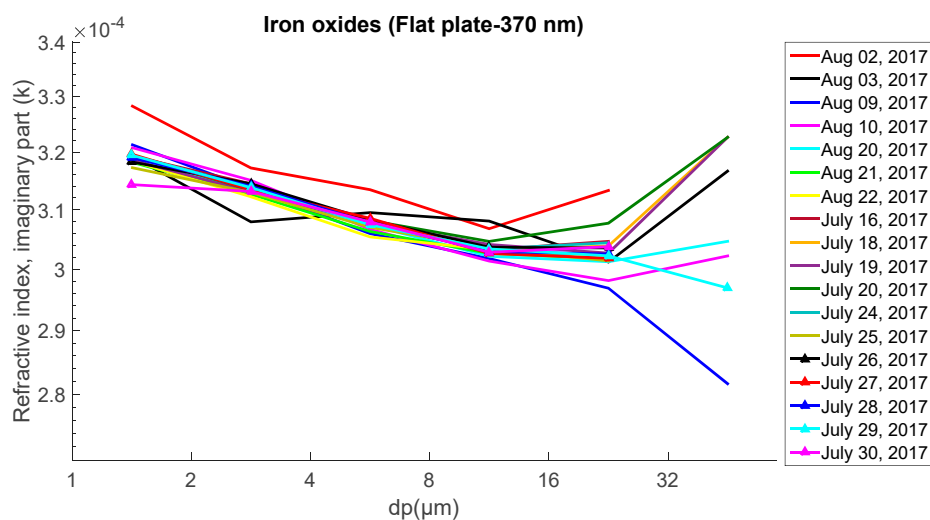

**Figure S 7:** Average complex refractive index (imaginary part) of iron oxide particles for different sampling days deduced from individual particle analysis (at wave length=370 nm).

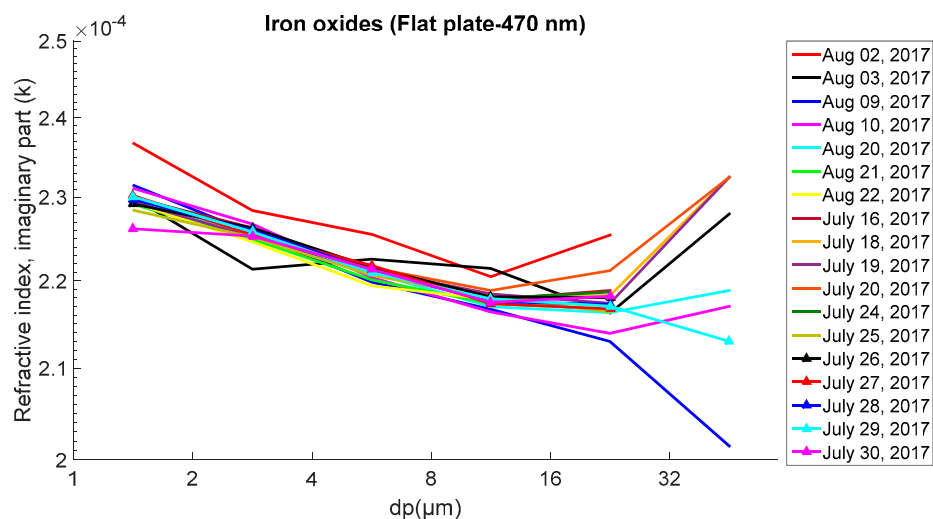

**Figure S 8:** Average complex refractive index (imaginary part) of iron oxide particles for different sampling days deduced from individual particle analysis (at wave length=470 nm).

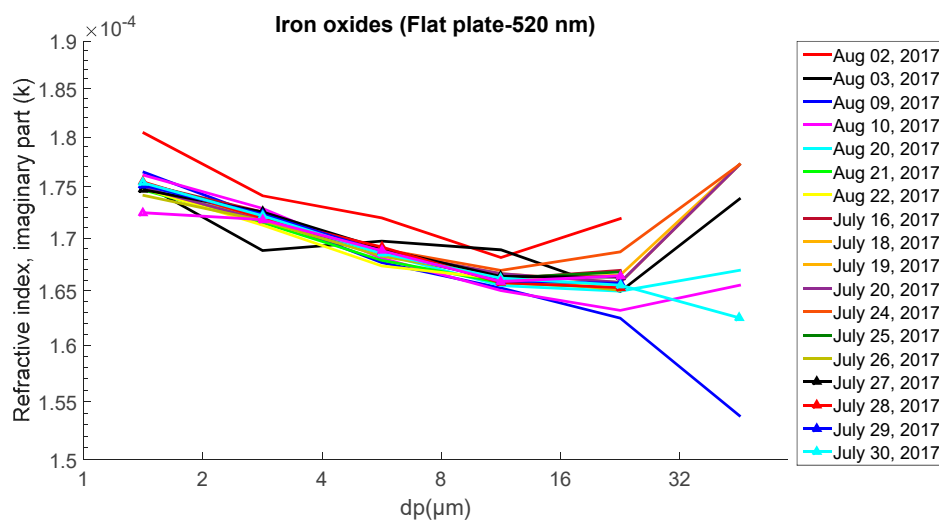

**Figure S 9:** Average complex refractive index (imaginary part) of iron oxide particles for different sampling days deduced from individual particle analysis (at wave length=520 nm).

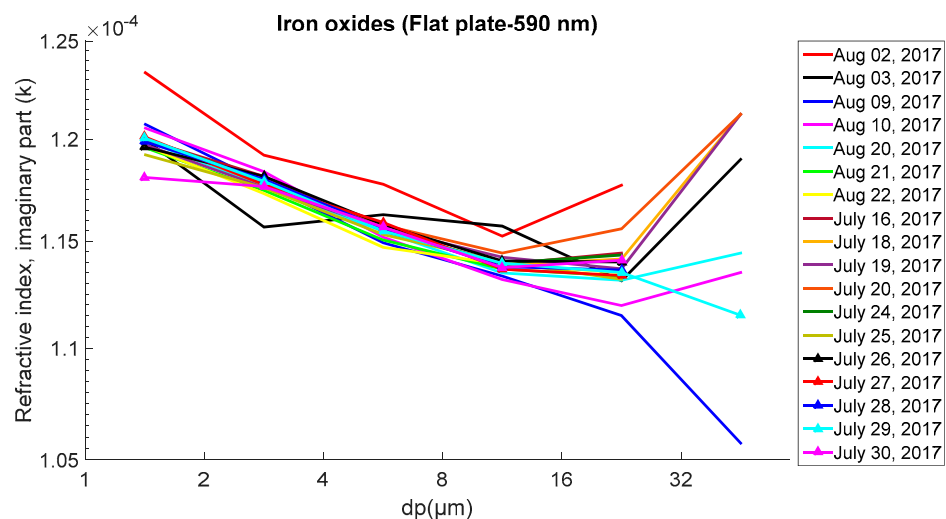

**Figure S 10:** Average complex refractive index (imaginary part) of iron oxide particles for different sampling days deduced from individual particle analysis (at wave length=590 nm).

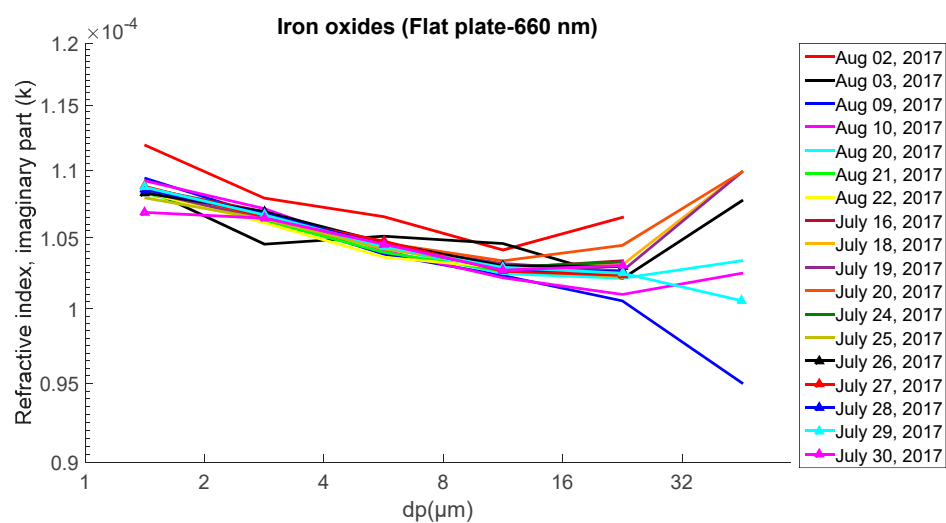

**Figure S 11:** Average complex refractive index (imaginary part) of iron oxide particles for different sampling days deduced from individual particle analysis (at wave length=660 nm).

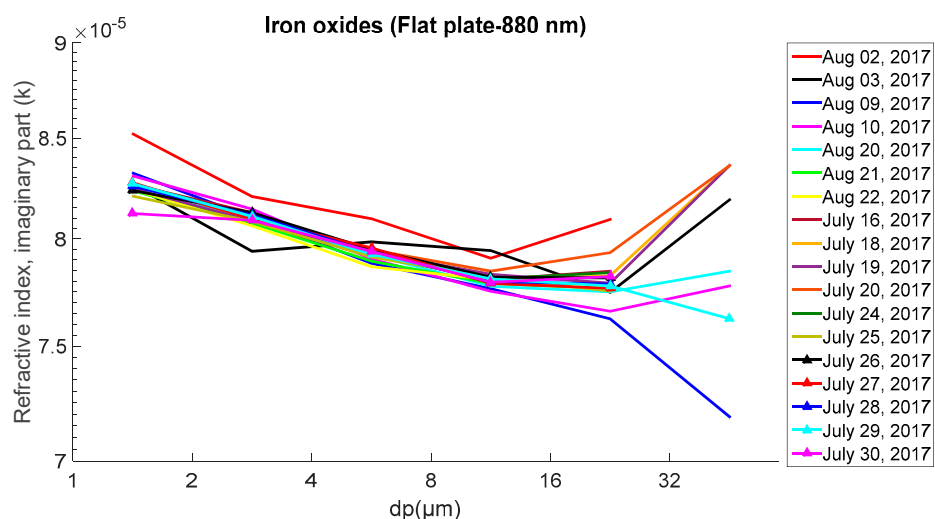

**Figure S 12:** Average complex refractive index (imaginary part) of iron oxide particles for different sampling days deduced from individual particle analysis (at wave length=880 nm).

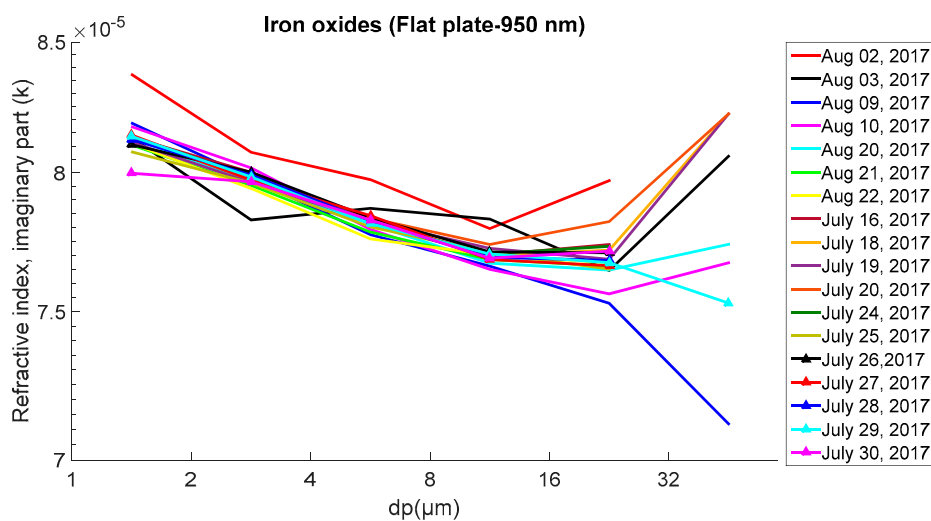

**Figure S 13:** Average complex refractive index (imaginary part) of iron oxide particles for different sampling days deduced from individual particle analysis (at wave length=950 nm).

## 4 Internal mixing of dust particle with sulfate

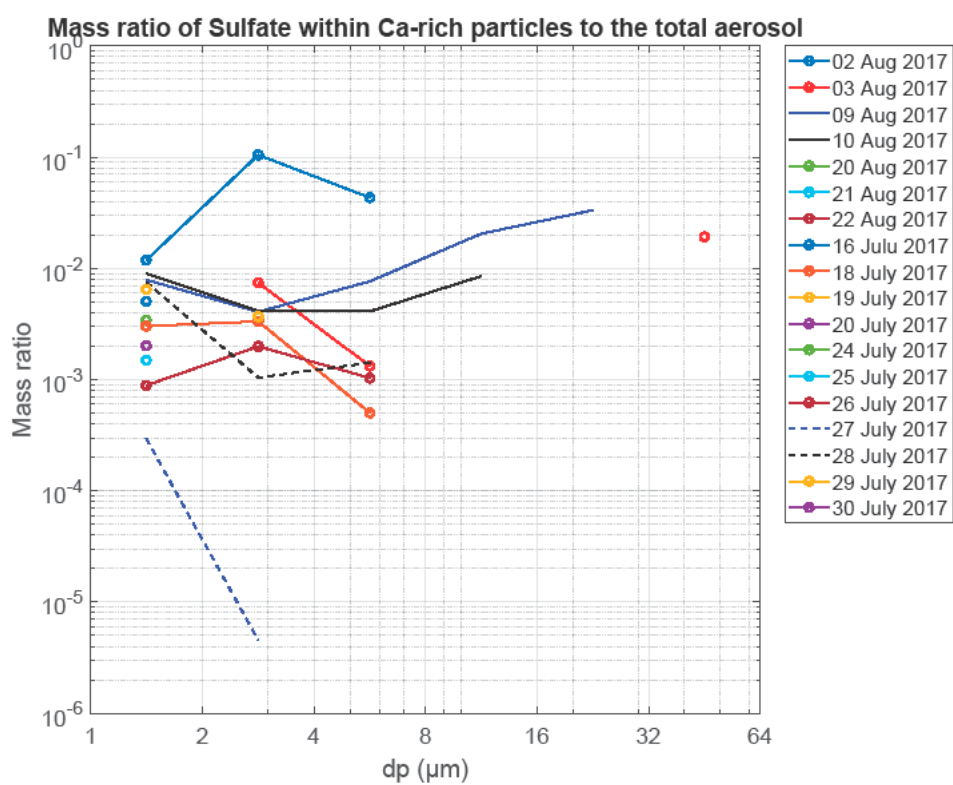

(a)

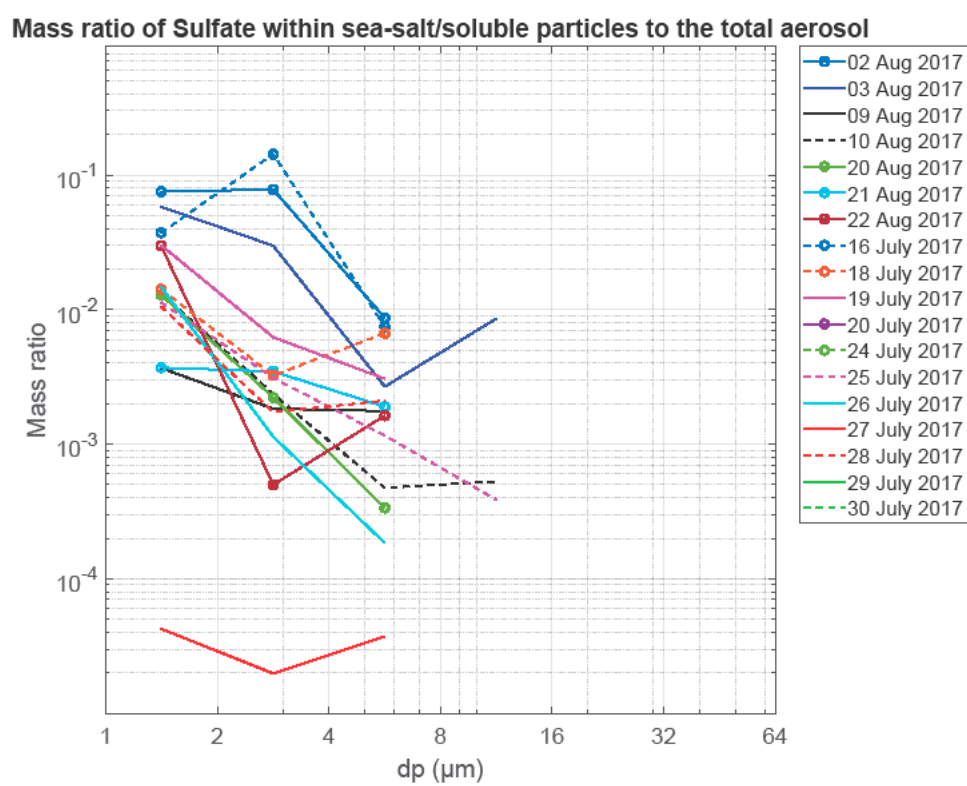

(b)

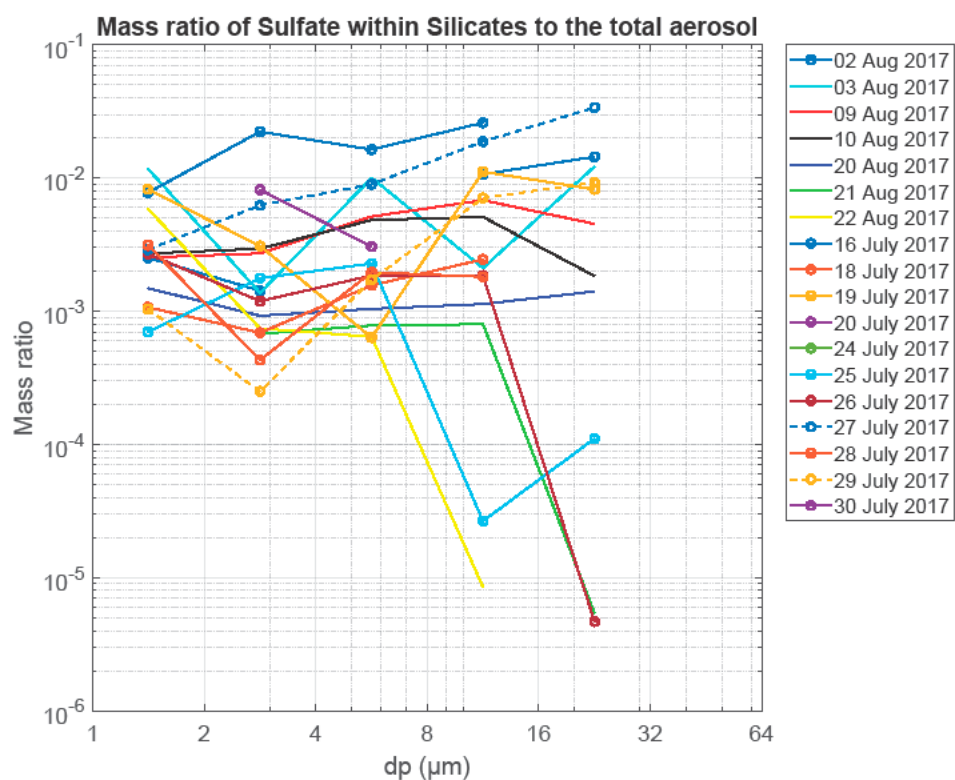

(c)

**Figure S 14:** Relative mass contribution of sulfate particles to the major components (**a**: Sulfate in Ca-rich; **b**: Sulfate in sea-salt/ soluble particles; **c**: Sulfate in Silicates) of dust aerosol particles in different sampling days deduced from individual particle analysis.

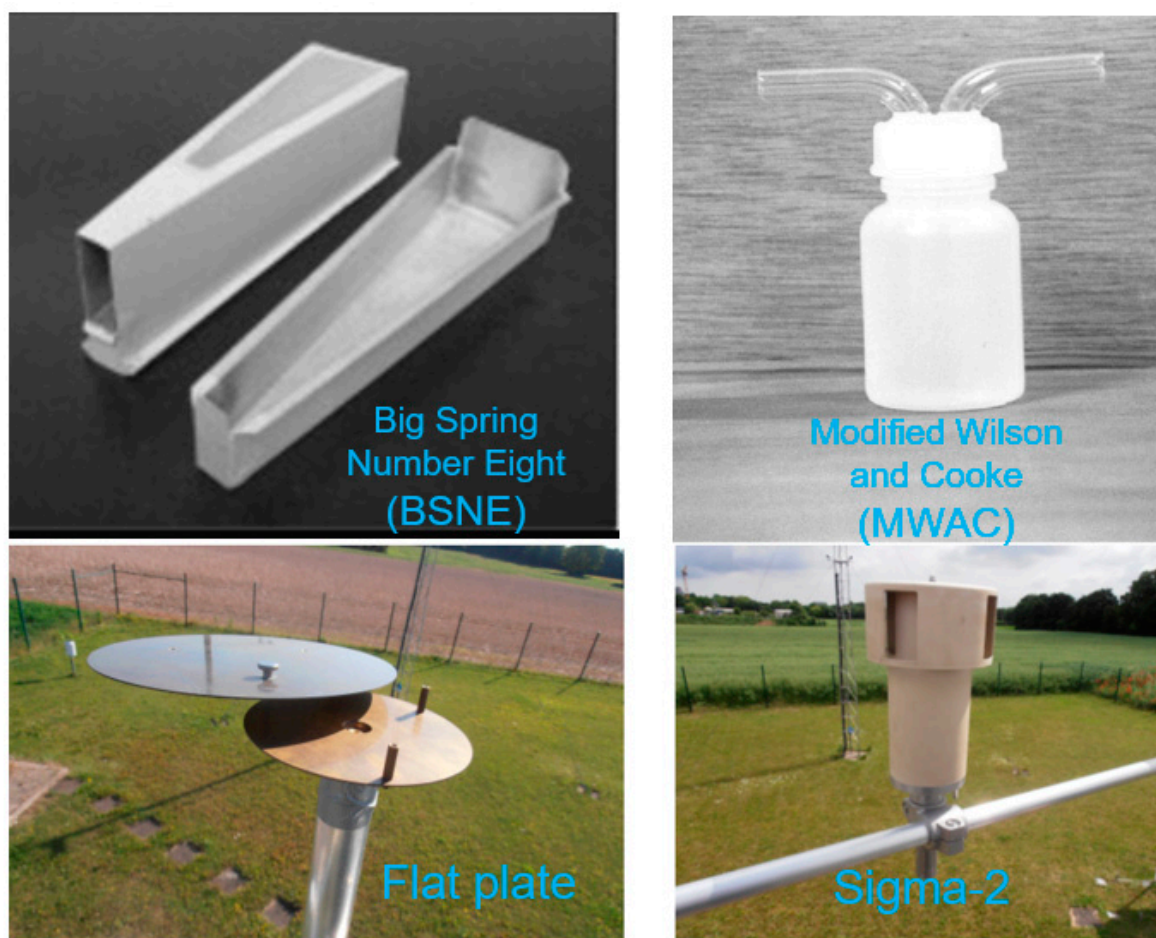

**Figure S 15:** Photos of different kinds of passive (surrogate) samplers used in the field campaign  
(Note: The data for the last sampler (Sigma-2) has not been included in this work).



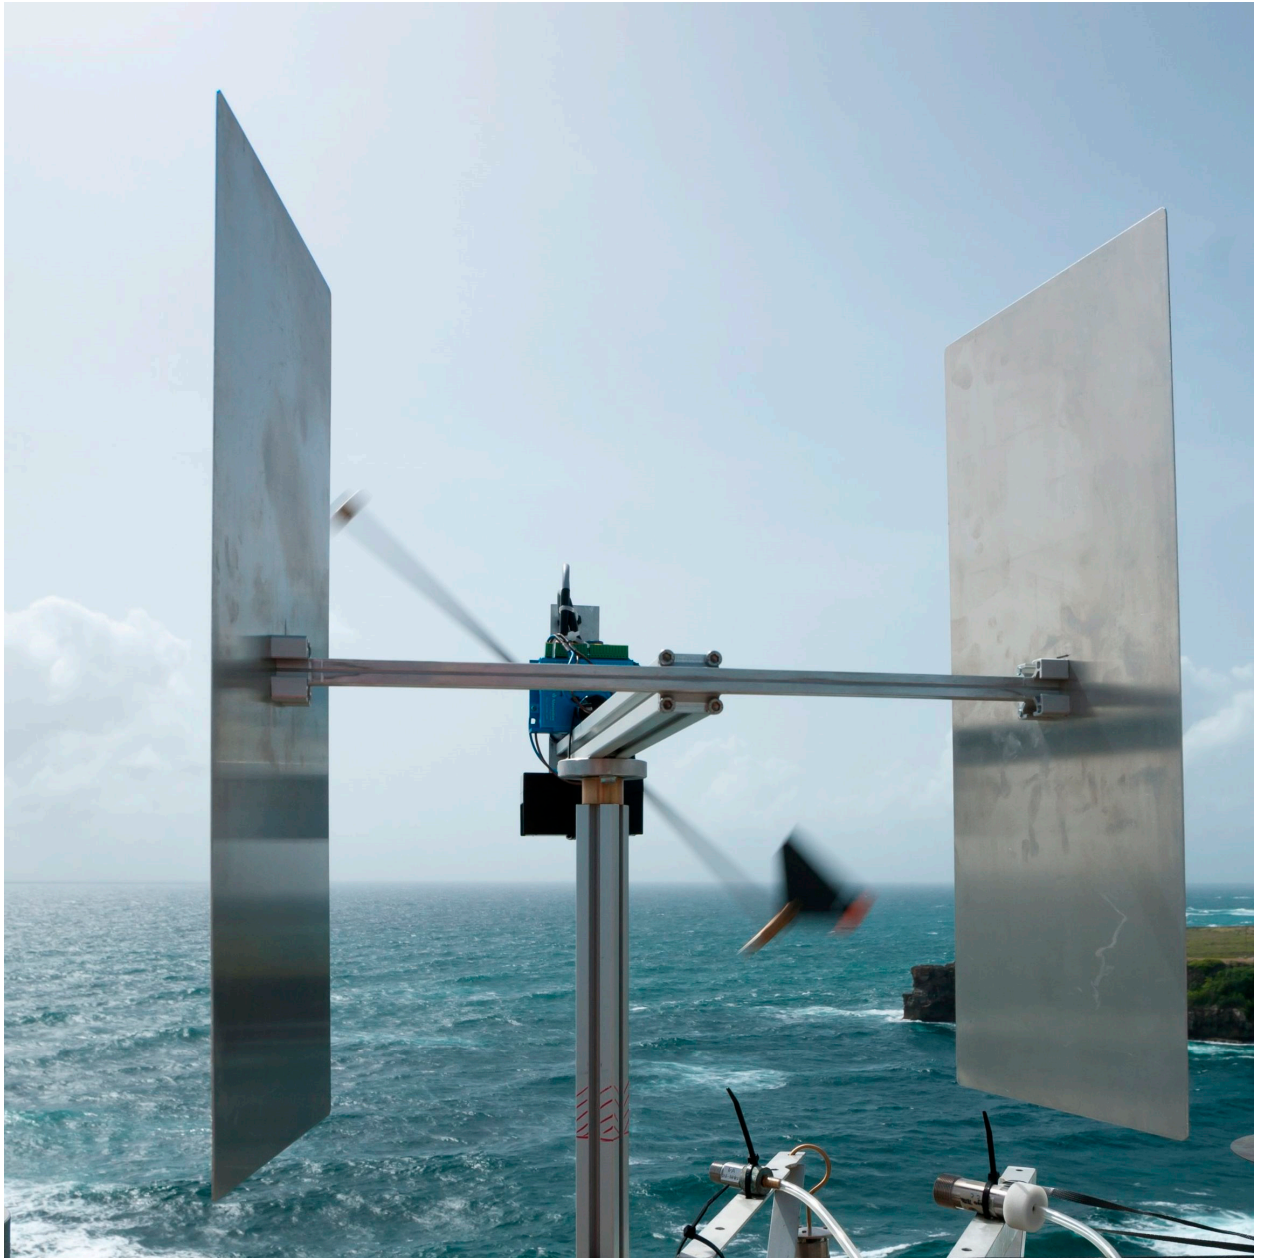

**Figure S 16:** Photo of the free wing Impactor (FWI) used in the field campaign.
